# Supplementary material
Source: PubMed Central journal article supplement (PMC5700340)
Supplement: AAC.01050-17_zac012176687s1.pdf [file AAC.01050-17_zac012176687s1.pdf]

## Supplement Data

**Figure 1.** Patient selection flowchart.

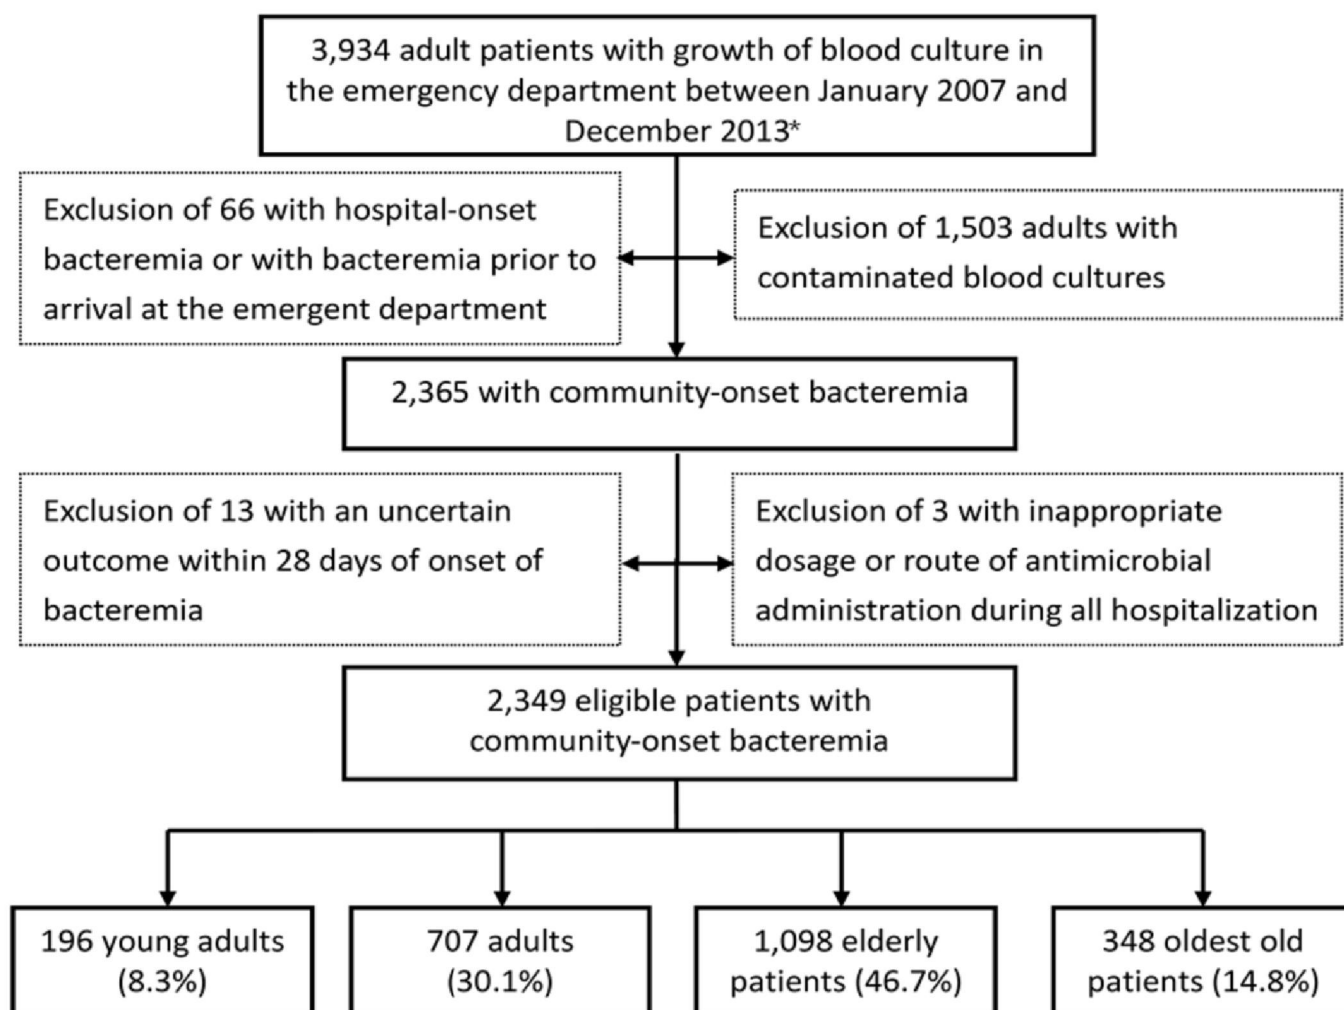

\* Only the first episode was included if there were multiple bacteremic episodes.
